# Supplementary material for: Overexpression of Orange Gene (OsOr-R115H) Enhances Heat Tolerance and Defense-Related Gene Expression in Rice (Oryza sativa L.)
Source: MDPI journal article supplement (doi:10.3390/genes12121891), 2021-11-26
Supplement: s1 [file s1]

**Supplementary Table S1. Primers used for qRT-PCR analysis in this study. F: forward; R: reverse.**

| Primer name             | Sequence (5' to 3')            | Gene ID      |
|-------------------------|--------------------------------|--------------|
| <i>OsDREB2A F</i>       | AGATTGCTCCGTGCAAGTG            | Os04g0572400 |
| <i>OsDREB2A R</i>       | CTGGAGCTTCTGGTTTTGCT           |              |
| <i>OsDREB1A F</i>       | TGGAGCTACTAGAGCTCAATCAACTG     | Os01g0165000 |
| <i>OsDREB1A R</i>       | TGGCATCGGAAGCCAGAA             |              |
| <i>OsAPX2 F</i>         | CTCTCCTACGCCGACTTCTAC          | Os01g0165000 |
| <i>OsAPX2 R</i>         | AGGTGGTCAGAACCTTGTGT           |              |
| <i>OsSNAC1 F</i>        | GTCAAGACTGATTGGATCATGC         | Os03g0815100 |
| <i>OsSNAC1 R</i>        | CCAATCATCCAACCTGAGAGA          |              |
| <i>OsSOD-Cu/Zn F</i>    | GCTCTATTGCGTTGTATGCCA          | Os04g0573200 |
| <i>OsSOD-Cu/Zn R</i>    | GCTTGACTCCCAAATGGTGAC          |              |
| <i>OsLEA3 F</i>         | GGCGCAGTACACCAAGGA             | Os05g0542500 |
| <i>OsLEA3 R</i>         | ACCTGCTCACTCGCCTGT             |              |
| <i>OsCATA F</i>         | GCCGGATAGACAGGAGAGGT           | Os02g0115700 |
| <i>OsCATA R</i>         | TCTTCACATGCTTGGCTTCA           |              |
| <i>OsCATB F</i>         | GGTGGGTTGATGCTCTCTCA           | Os06g0727200 |
| <i>OsCATB R</i>         | ATTCCTCCTGGCCGATCTAC           |              |
| <i>OsP5CS F</i>         | TTCATGGGAAAAAATTGGT            | Os05g0455500 |
| <i>OsP5CS R</i>         | CCGCAATAAGATGCTTGTA            |              |
| <i>NOS F</i>            | CAGAGGAGGACGCTGGTGTA           | -            |
| <i>NOS R</i>            | CCGCTCGAGATCCAGTTAGGAGCTGAAAAC |              |
| <i>Bar F</i>            | CGTCAACCACTACATCGAGA           | -            |
| <i>Bar R</i>            | AAGTCCAGCTGCCAGAAA             |              |
| <i>OsOr F</i>           | TTTCACTCTTGGTGTGAAGCAGAT       | Os02g0651300 |
| <i>OsOr R</i>           | GACTTCCTTCACGATTTCATCGTAA      |              |
| <i>OsActin F</i>        | GGCTGTTTTCCCTAGTATCG           | Os03g0718100 |
| <i>OsActin R</i>        | GTACGTCCACTGGCATAACAG          |              |
| TaqMan <i>Nos</i> ter F | TTGCGGGACTCTAATCATAAAAA        | -            |
| TaqMan <i>Nos</i> ter R | GAATCCTGTTGCCGGTCTT            |              |
